# Supplementary material for: A novel electrochemical sensor for the determination of histidine based on a molecularly imprinted copolymer
Source: Royal Society of Chemistry journal article supplement (doi:10.1039/d1ay01492g), 2021-01-01
Supplement: d1ay01492g1.pdf [file d1ay01492g1.pdf]

## Electronic Supplementary Information

A table of contents entry

### **A novel electrochemical sensor for determination of Histidine based on molecularly imprinted copolymer**

Zahra Mirzaei Karazan,<sup>a</sup> Mahmoud Roushani <sup>a,\*</sup>

<sup>a</sup>Department of Chemistry, Faculty of Sciences, Ilam University, Ilam, P. O. BOX. 69315-516, Iran

✉ Corresponding author: Tel/fax: +98 84 32227022

E-mail address: m.roushani@ilam.ac.ir and mahmoudroushani@yahoo.com (M. Roushani)

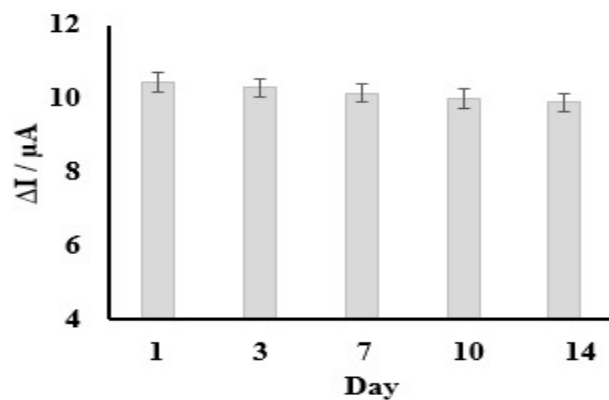

**Fig. S1.** Histogram of the  $\Delta I$  response of MIP-PmDB/PoAP-GCE for 0.5  $\mu M$  His in 5.0 mM of  $[Fe(CN)_6]^{3-/4-}$  solution for investigate the sensor's stability.

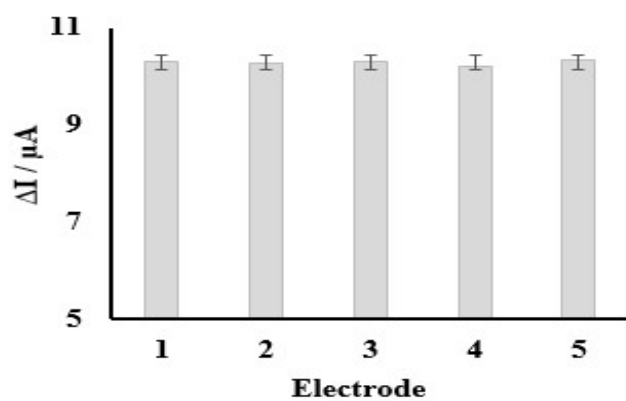

**Fig. S2.** The reproducibility of five MIP-PmDB/PoAP-GCEs in 5.0 mM of  $[Fe(CN)_6]^{3-/4-}$  solution containing 0.5  $\mu M$  His.
